# Supplementary material for: Phosphorus-Rich Ruthenium Phosphide Embedded on a 3D Porous Dual-Doped Graphitic Carbon for Hydrogen Evolution Reaction
Source: MDPI journal article supplement (doi:10.3390/nano12203597), 2022-10-13
Supplement: s1 [file s1]

# Phosphorus-Rich Ruthenium Phosphide Embedded on a 3D Porous Dual-Doped Graphitic Carbon for Hydrogen Evolution Reaction

Aicha Anouar <sup>1,2,\*</sup>, Antonio Doménech-Carbó <sup>3,\*</sup> and Hermenegildo Garcia <sup>2,\*</sup>

<sup>1</sup> Engineering Division, Euromed Research Institute, EuroMed University of Fes (UEMF), Route de Meknes, Rond-Point de Bensouda, Fès 30070, Morocco

<sup>2</sup> Departamento de Química (UPV), Instituto de Tecnología Química (CSIC-UPV), Universitat Politècnica de València, Av. de los Naranjos s/n, 46022 Valencia, Spain

<sup>3</sup> Departament de Química Analítica, Universitat de València, Dr. Moliner 50, Burjassot, 46100 Valencia, Spain

\* Correspondence: a.anouar@ueuromed.org (A.A.); antonio.domenech@uv.es (A.D.-C.); hgarcia@qim.upv.es (H.G.)

**Figure S1.** FESEM images of N,P-dual doped porous graphitic carbon (N-P-C)

**Figure S2.** N<sub>2</sub> adsorption desorption isotherm of N-P-C

**Figure S3.** Bright Field STEM images of N-P-C

**Figure S4.** Ss <sup>31</sup>P NMR spectrum of N-P-C

**Figure S5.** FESEM image and associated EDX mapping of RuP<sub>2</sub>@N-P-C

**Figure S6.** XRD pattern of RuP<sub>2</sub>@N-P-C

**Figure S7.** Raman spectrum of RuP<sub>2</sub>@N-P-C

**Figure S8.** EDX spectrum of RuP<sub>2</sub>@N-P-C

**Figure S9.** Dark-field STEM images of RuP<sub>2</sub>@N-P-C

**Figure S10.** Negative-going LSVs of RuP<sub>2</sub>@N-P-C (red) and Pt/C-modified (black) glassy carbon electrodes under stirring conditions (650 rpm) in contact with 1.0 M KOH. Potential scan rate 5 mV s<sup>-1</sup>.

**Figure S11.** Negative-going LSVs of RuP<sub>2</sub>@N-P-C modified GCE in contact with 0.50 M H<sub>2</sub>SO<sub>4</sub> (red) and 0.50 M H<sub>2</sub>SO<sub>4</sub> + 0.15 M LiClO<sub>4</sub> under quiescent conditions. Potential scan rate 2 mV.s<sup>-1</sup>.

**Figure S12.** CV of RuP<sub>2</sub>@N-P-C-modified glassy carbon electrode recorded under quiescent conditions in contact with 0.50 M H<sub>2</sub>SO<sub>4</sub> + 0.27 M LiClO<sub>4</sub> solution. Potential scan initiated at 0.30 V vs. RHE in the negative direction; potential scan rate 50 mV.s<sup>-1</sup>. The arrows mark the ascending (initial cathodic scan) and descending (subsequent positive-going scan) branches of the CV.

**Figure S13.** Variation of: a) the limiting current and b) the half-wave potential with the concentration of Li<sup>+</sup> in CVs at RuP<sub>2</sub>@N-P-C-modified GCEs recorded under quiescent conditions in contact with 0.50 M H<sub>2</sub>SO<sub>4</sub> + LiClO<sub>4</sub> solutions. Potential scan initiated at 0.30 V vs. RHE in the negative direction; potential scan rate 50 mV.s<sup>-1</sup>.

**Figure S14.** Nyquist plots of RuP<sub>2</sub>@N-P-C-modified GCEs recorded under quiescent conditions in contact with 0.50 M H<sub>2</sub>SO<sub>4</sub> and 0.50 M H<sub>2</sub>SO<sub>4</sub> + 0.14 M LiClO<sub>4</sub> solutions. Bias potential 0.40 V vs. RHE. The inset shows the magnified view of the high frequency region.

**Figure S15.** Nyquist plots of RuP<sub>2</sub>@N-P-C-modified GCEs recorded under quiescent conditions in contact with a) 0.50 M H<sub>2</sub>SO<sub>4</sub> and b) 0.50 M H<sub>2</sub>SO<sub>4</sub> + 0.14 M LiClO<sub>4</sub> solutions. Bias potential −0.20 V vs. RHE. Experimental data points (black circles) are superimposed to the theoretical impedance spectra (continuous lines) based on the fit of experimental data to the equivalent circuit in c). This equivalent circuit contains the solution resistance (R<sub>s</sub>) in series with two parallel RC units, the first one contains the charge transfer resistance (R<sub>ct</sub>) and the double-layer capacitance (C<sub>dl</sub>); the second can be associated to the porous

RuP<sub>2</sub>@N-P-C modifier. Its impedance is constituted by a porous resistance ( $R_{por}$ ) and a non-ideal capacitance element, represented by a constant phase element ( $Q_{por}$ ).

**Figure S16.** Variation of the  $R_{por}$  determined after fitting the experimental impedance spectra recorded at RuP<sub>2</sub>@N-P-C-modified GCEs in contact with 0.50 M H<sub>2</sub>SO<sub>4</sub> plus LiClO<sub>4</sub> solutions with the Li<sup>+</sup> concentration at different bias potentials.

**Table S1.** Comparison of the catalytic parameters of RuP<sub>2</sub>@N-P-C with other HER catalysts. Data in this study were taken from LSVs carried out at a potential scan rate of 2 mV s<sup>−1</sup>.

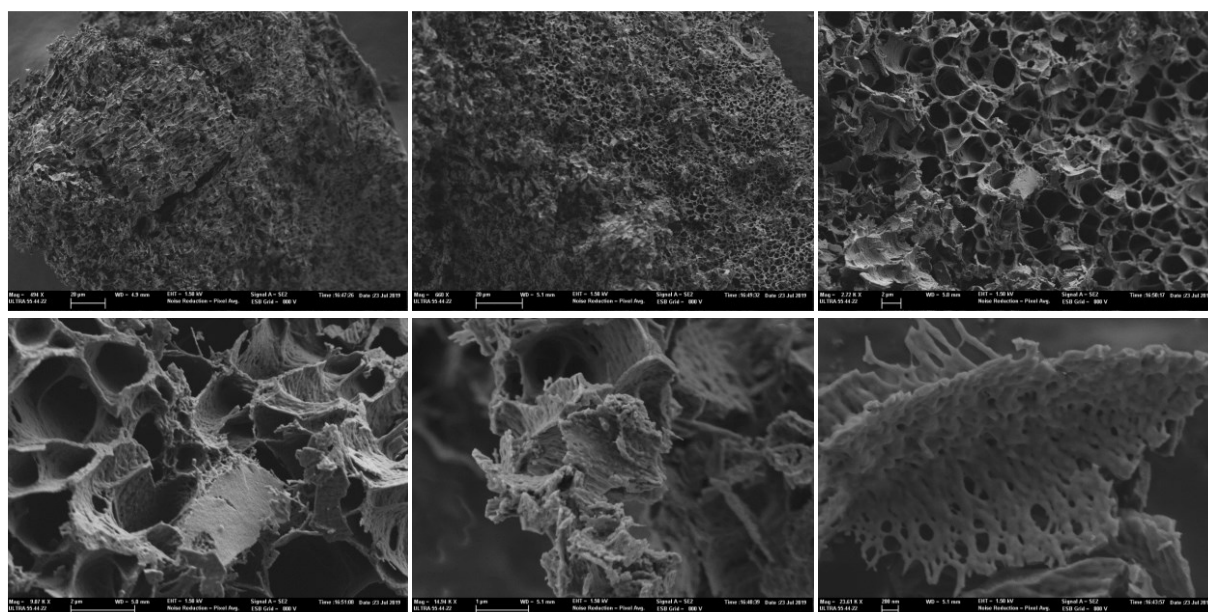

**Figure S1.** FESEM images of N,P-dual doped porous graphitic carbon (N-P-C).

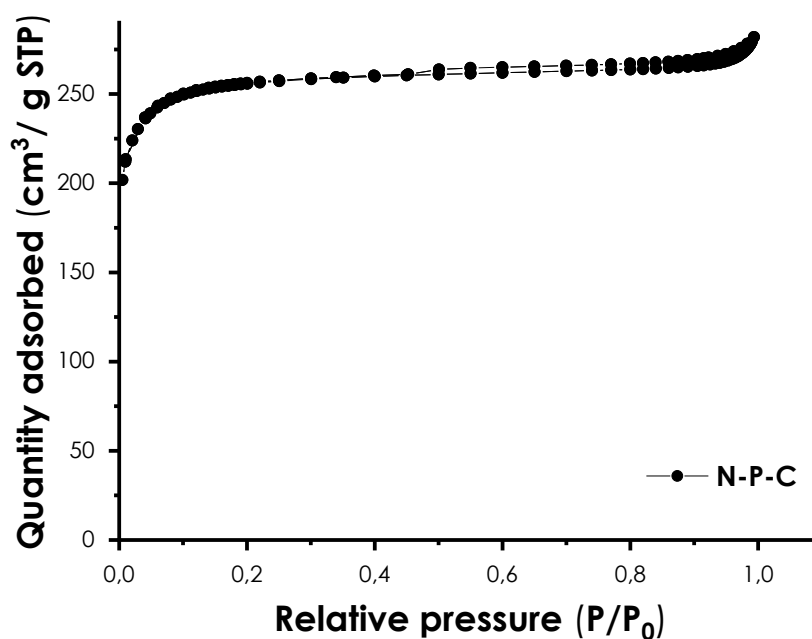

**Figure S2.** N<sub>2</sub> adsorption-desorption isotherm of N-P-C.

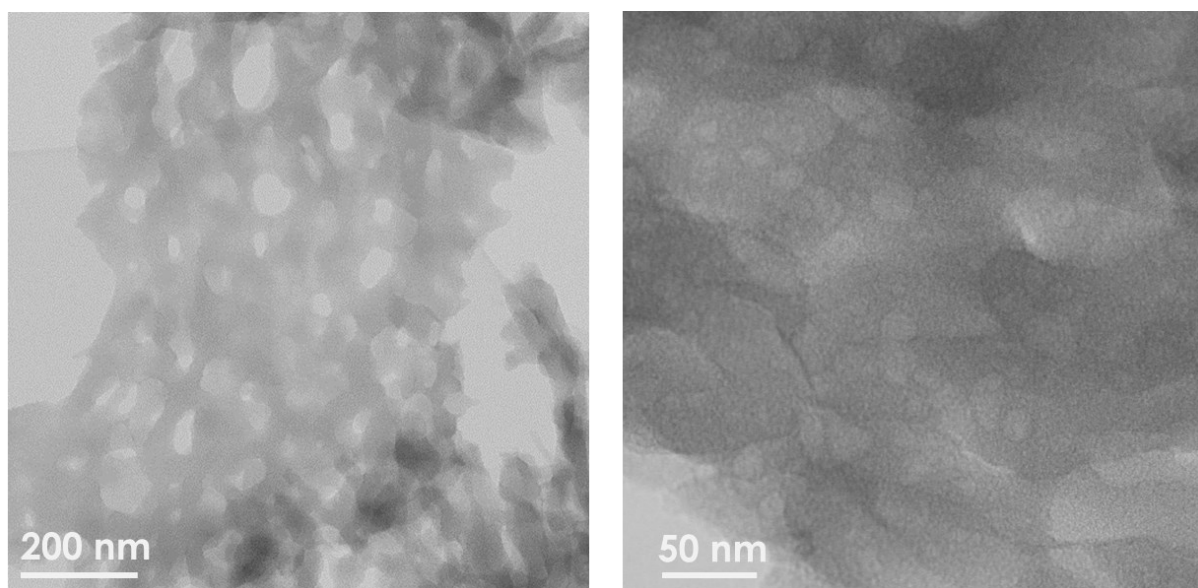

**Figure S3.** Bright Field STEM images of N-P-C.

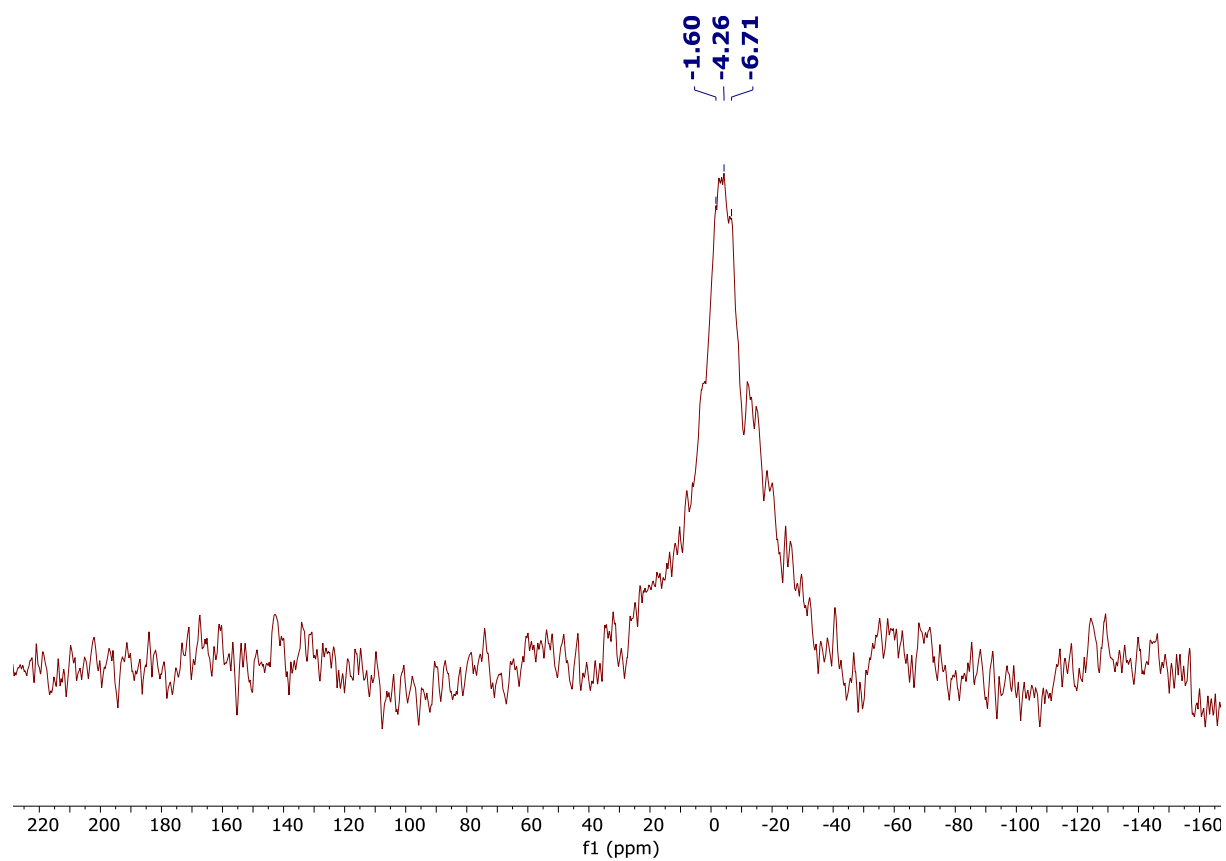

**Figure S4.** Ss  $^{31}\text{P}$  NMR spectrum of N-P-C.

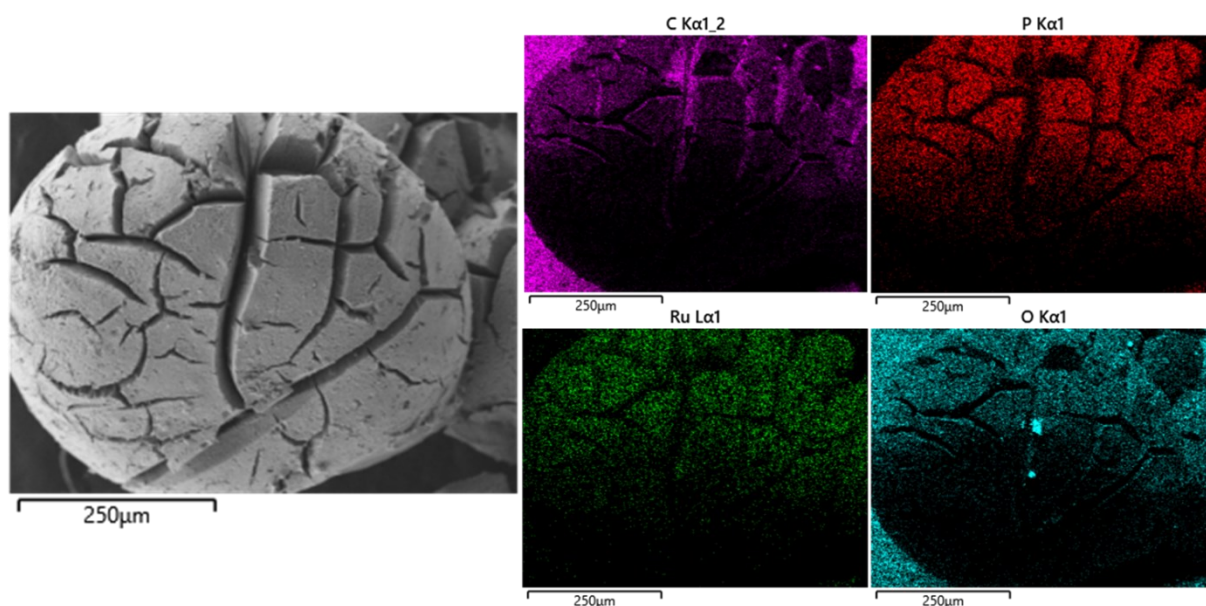

**Figure S5.** FESEM image and associated EDX mapping of RuP<sub>2</sub>@N-P-C.

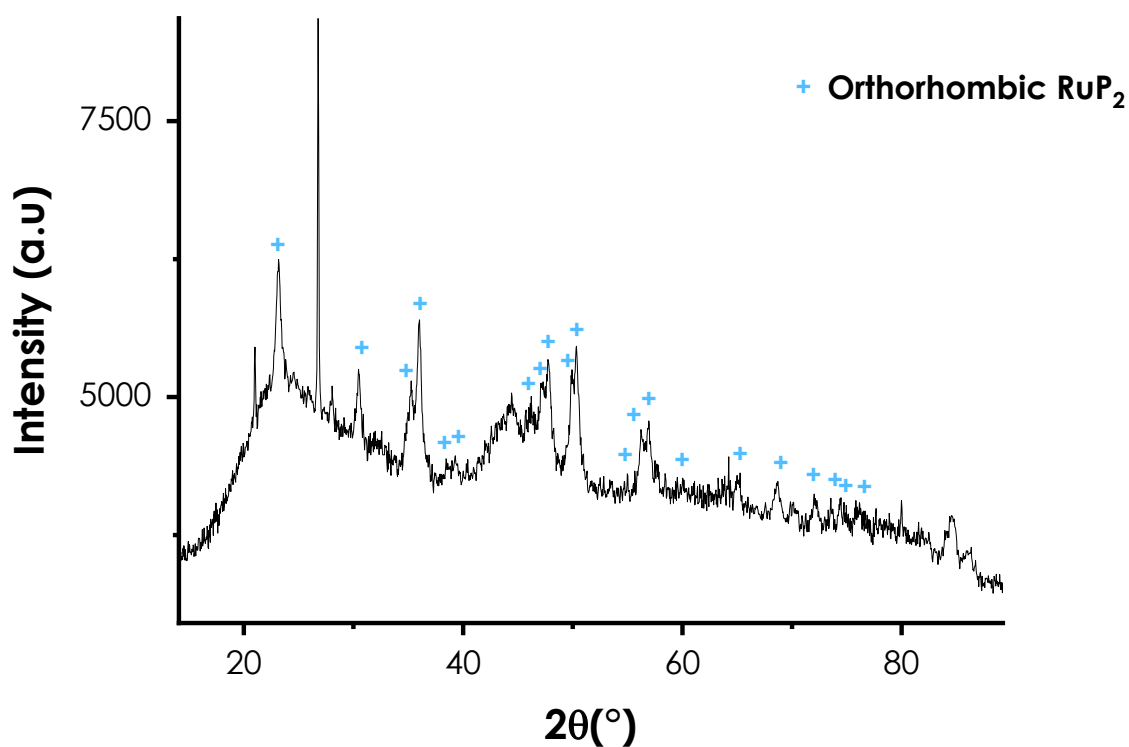

**Figure S6.** XRD pattern of RuP<sub>2</sub>@N-P-C.

As displayed in the XRD pattern of RuP<sub>2</sub>@N-P-C, the peaks depicted at 23°, 30.4°, 35°, 36.1°, 38.5°, 39.2°, 46.1°, 47.1°, 47.5°, 49.9°, 50.2°, 54.9°, 56.2°, 56.9°, 59.9°, 65.1°, 68.6°, 72.1°, 73.6°, 74.5° and 76.2° correspond respectively to the (110), (020), (012), (101), (021), (111), (022), (112), (121), (013), (211), (031), (103), (122), (113), (200), (123), (202), (024), (114) and (041) planes of the orthorhombic RuP<sub>2</sub> phase.

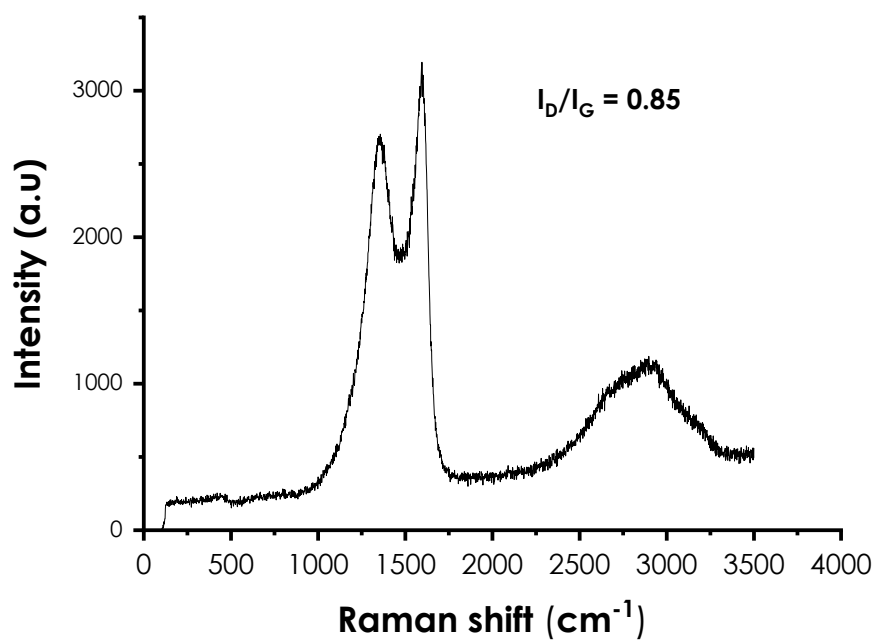Figure S7. Raman spectrum of  $\text{RuP}_2@\text{N-P-C}$ .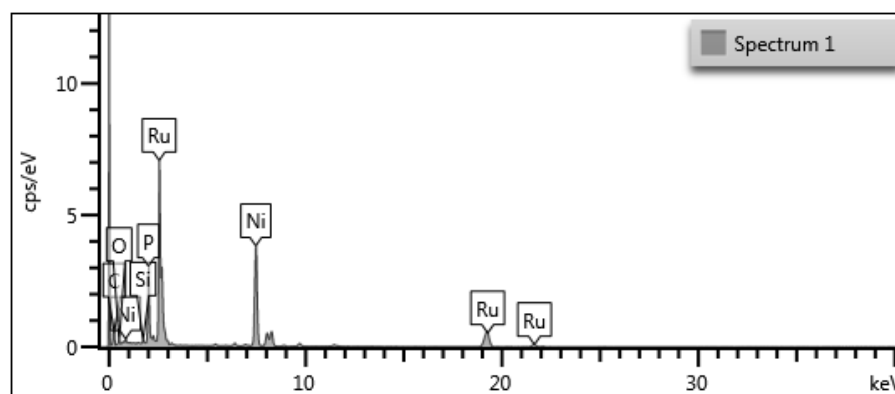Figure S8. EDX spectrum of  $\text{RuP}_2@\text{N-P-C}$ .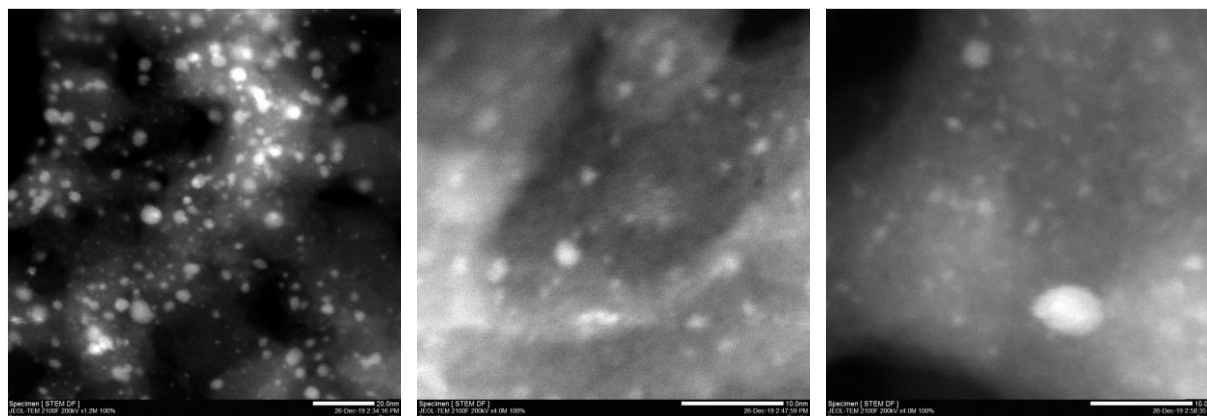Figure S9. Dark-field STEM images of  $\text{RuP}_2@\text{N-P-C}$ .

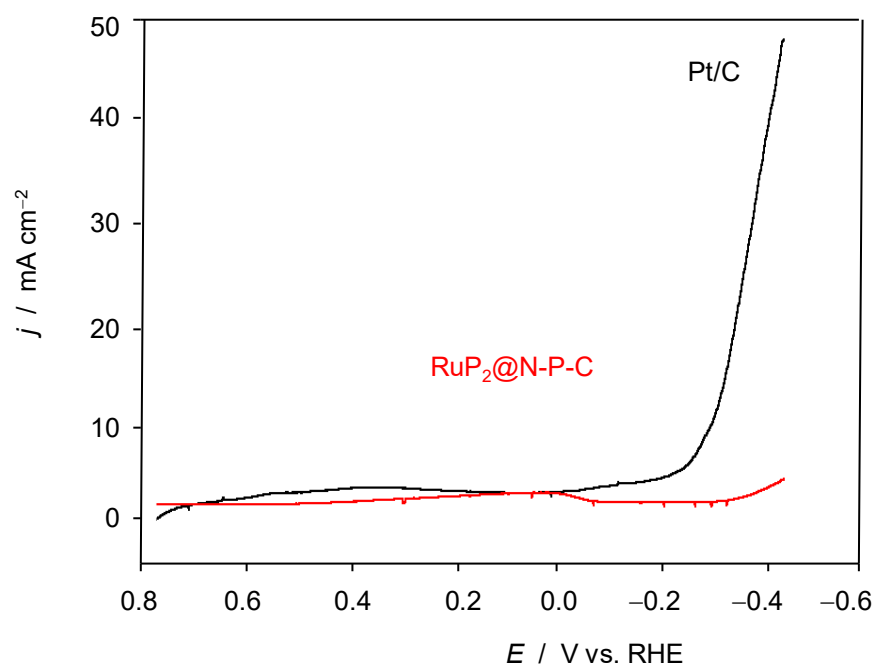

**Figure S10.** Negative-going LSVs of RuP<sub>2</sub>@N-P-C (red) and Pt/C-modified (black) glassy carbon electrodes under stirring conditions (650 rpm) in contact with 1.0 M KOH. Potential scan rate 5 mV s<sup>-1</sup>.

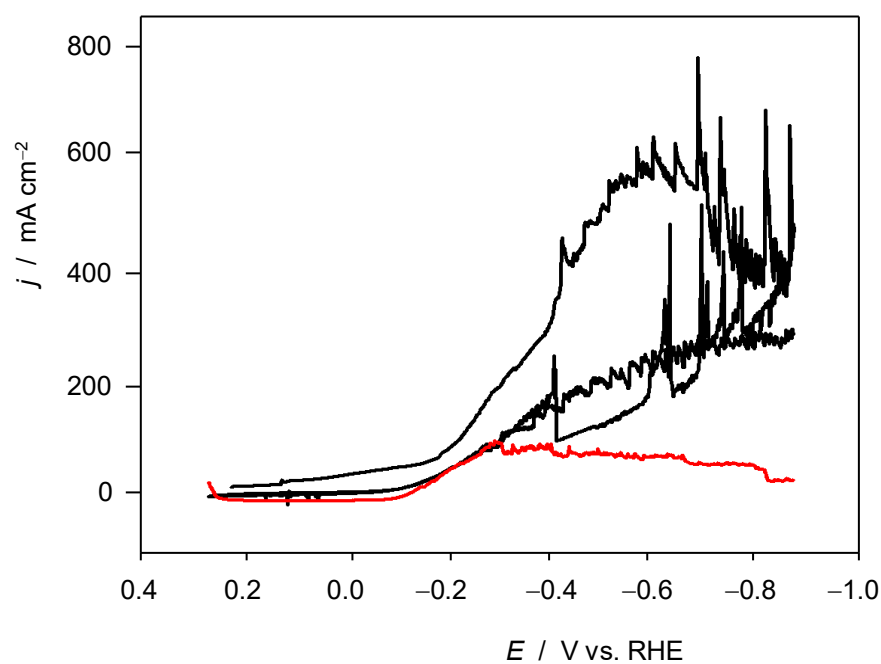

**Figure S11.** Negative-going LSVs of RuP<sub>2</sub>@N-P-C modified GCE in contact with 0.50 M H<sub>2</sub>SO<sub>4</sub> (red) and 0.50 M H<sub>2</sub>SO<sub>4</sub> + 0.15 M LiClO<sub>4</sub> under quiescent conditions. Potential scan rate 2 mV.s<sup>-1</sup>.

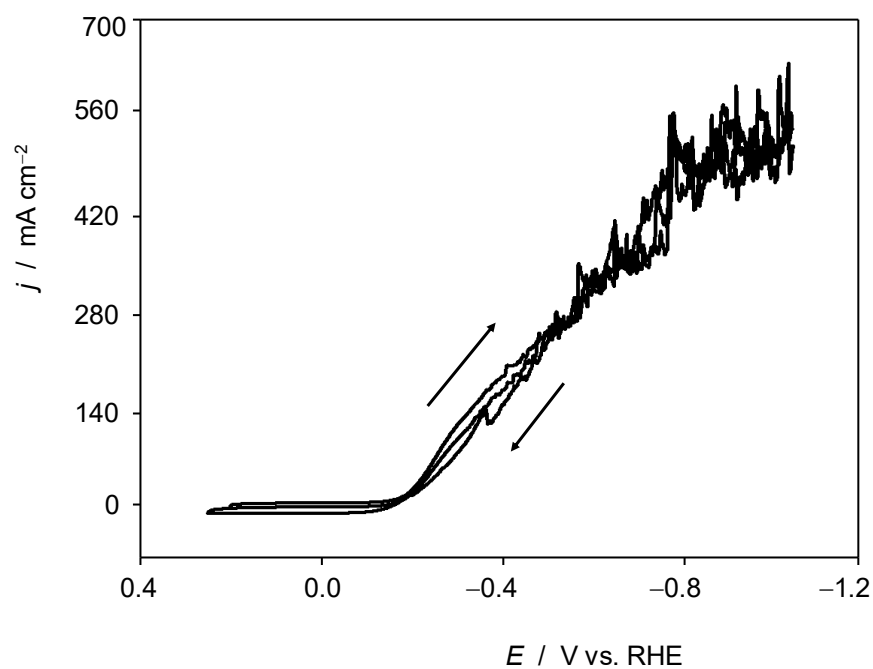

**Figure S12.** CV of RuP<sub>2</sub>@N-P-C-modified glassy carbon electrode recorded under quiescent conditions in contact with 0.50 M H<sub>2</sub>SO<sub>4</sub> + 0.27 M LiClO<sub>4</sub> solution. Potential scan initiated at 0.30 V vs. RHE in the negative direction; potential scan rate 50 mV.s<sup>-1</sup>. The arrows mark the ascending (initial cathodic scan) and descending (subsequent positive-going scan) branches of the CV.

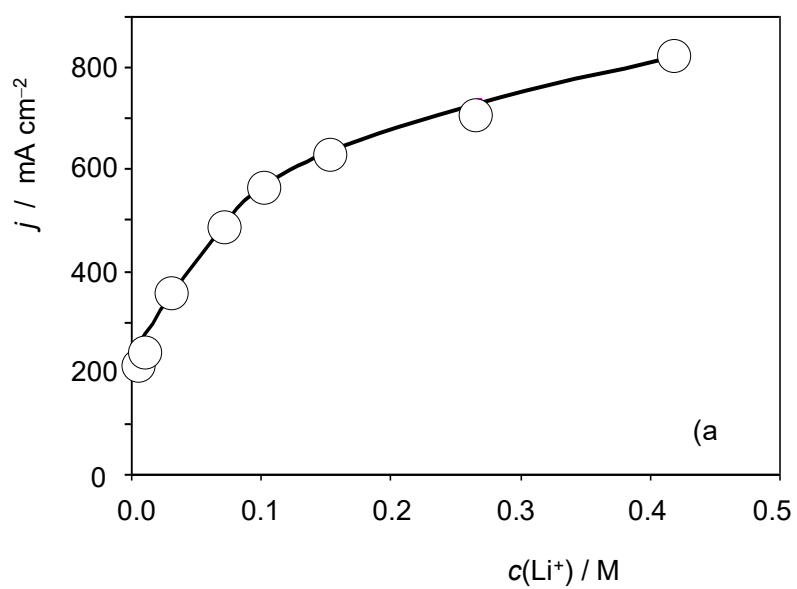

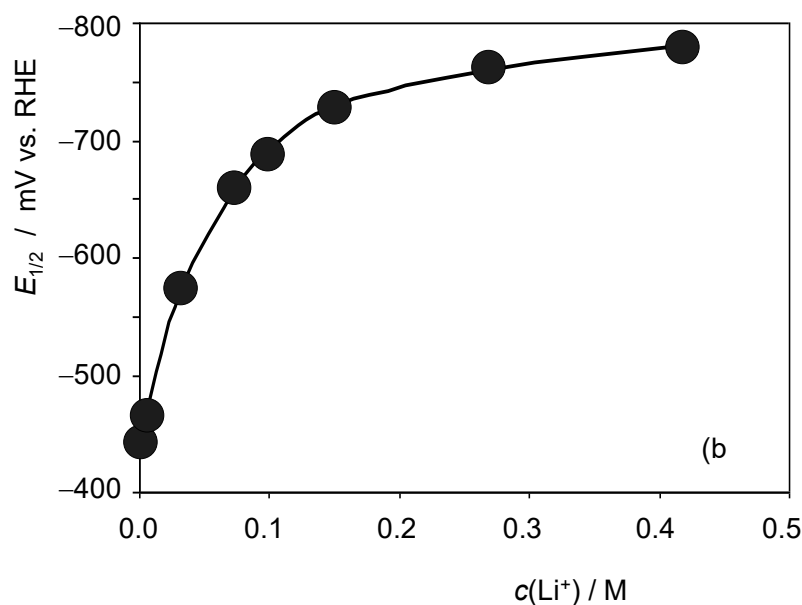

**Figure S13.** Variation of: (a) the limiting current and (b) the half-wave potential with the concentration of  $\text{Li}^+$  in CVs at  $\text{RuP}_2\text{@N-P-C}$ -modified GCEs recorded under quiescent conditions in contact with 0.50 M  $\text{H}_2\text{SO}_4 + \text{LiClO}_4$  solutions. Potential scan initiated at 0.30 V vs. RHE in the negative direction; potential scan rate  $50 \text{ mV}\cdot\text{s}^{-1}$ .

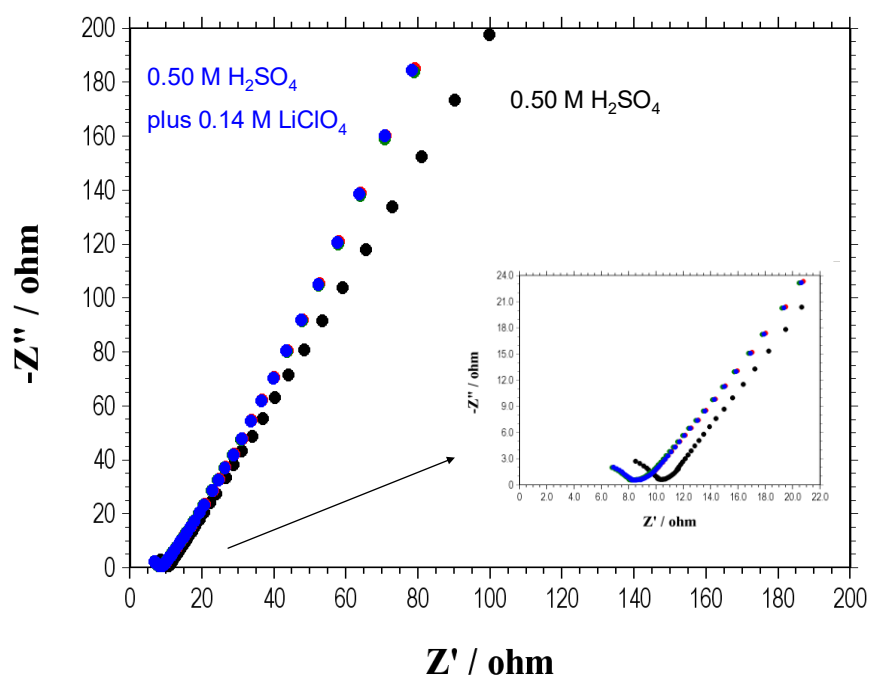

**Figure S14.** Nyquist plots of  $\text{RuP}_2\text{@N-P-C}$ -modified GCEs recorded under quiescent conditions in contact with 0.50 M  $\text{H}_2\text{SO}_4$  and 0.50 M  $\text{H}_2\text{SO}_4 + 0.14 \text{ M LiClO}_4$  solutions. Bias potential 0.40 V vs. RHE. The inset shows the magnified view of the high frequency region.



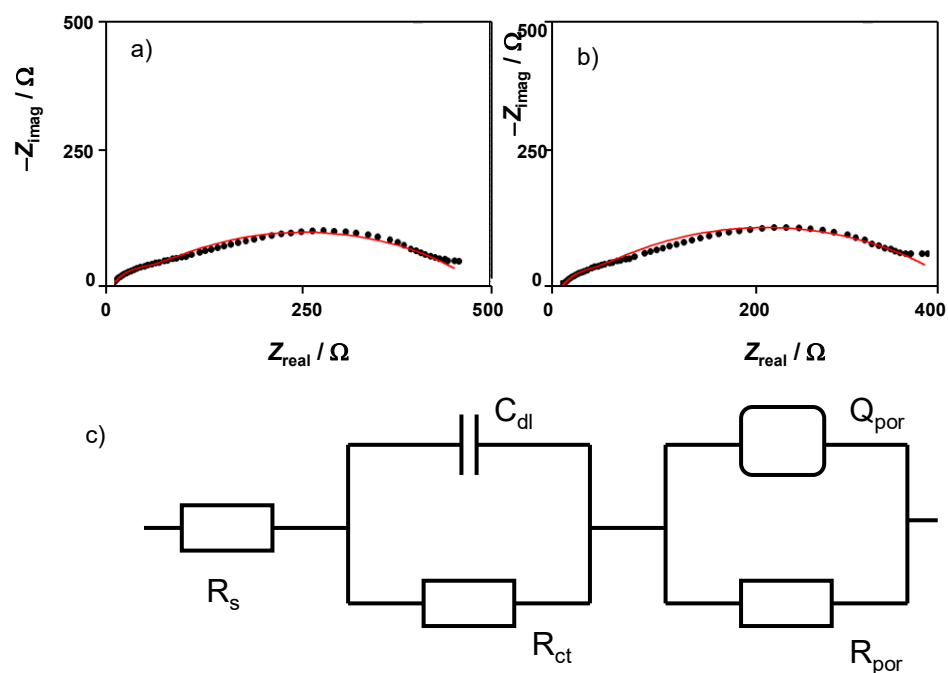

**Figure S15.** Nyquist plots of  $\text{RuP}_2@\text{N-P-C}$ -modified GCEs recorded under quiescent conditions in contact with (a) 0.50 M  $\text{H}_2\text{SO}_4$  and (b) 0.50 M  $\text{H}_2\text{SO}_4 + 0.14$  M  $\text{LiClO}_4$  solutions. Bias potential  $-0.20$  V vs. RHE. Experimental data points (black circles) are superimposed to the theoretical impedance spectra (continuous lines) based on the fit of experimental data to the equivalent circuit in (c). This equivalent circuit contains the solution resistance ( $R_s$ ) in series with two parallel RC units, the first one contains the charge transfer resistance ( $R_{\text{ct}}$ ) and the double-layer capacitance ( $C_{\text{dl}}$ ); the second can be associated to the porous  $\text{RuP}_2@\text{N-P-C}$  modifier. Its impedance is constituted by a porous resistance ( $R_{\text{por}}$ ) and a non-ideal capacitance element, represented by a constant phase element ( $Q_{\text{por}}$ ).

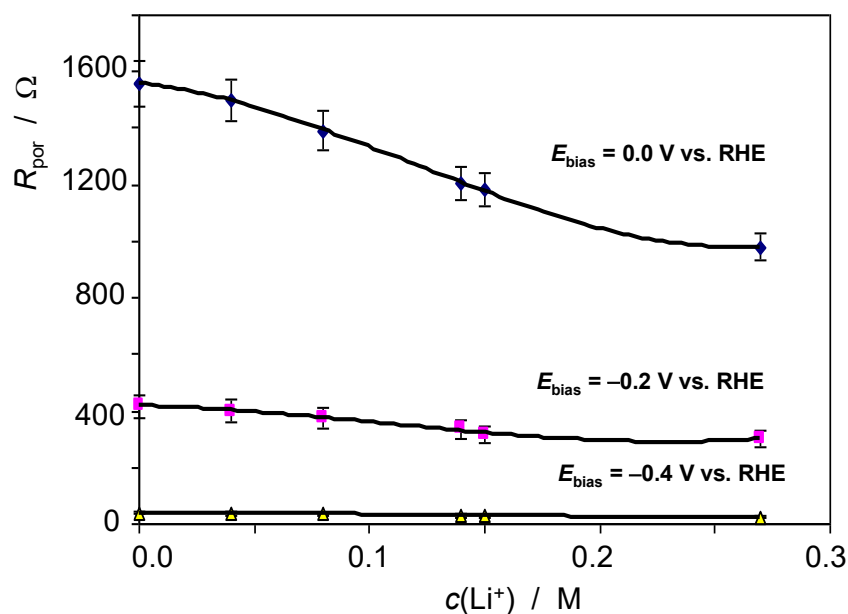

**Figure S16.** Variation of the  $R_{\text{por}}$  determined after fitting the experimental impedance spectra recorded at  $\text{RuP}_2@\text{N-P-C}$ -modified GCEs in contact with 0.50 M  $\text{H}_2\text{SO}_4$  plus  $\text{LiClO}_4$  solutions with the  $\text{Li}^+$  concentration at different bias potentials.

**Table S1.** Comparison of the catalytic parameters of RuP<sub>2</sub>@N-P-C with other HER catalysts. Data in this study were taken from LSVs carried out at a potential scan rate of 2 mV s<sup>-1</sup>.

| Catalyst                | Electrolyte                                                          | E <sub>onset</sub><br>(mV vs. RHE) | Tafel Slope<br>(mV Decade <sup>-1</sup> ) | Exchange Current<br>Density (mA cm <sup>-2</sup> ) |
|-------------------------|----------------------------------------------------------------------|------------------------------------|-------------------------------------------|----------------------------------------------------|
| Pt/C                    | 0.50 M H <sub>2</sub> SO <sub>4</sub>                                | 0                                  | 30                                        | $7.1 \times 10^{-1}$                               |
| MoS <sub>2</sub>        | 0.50 M H <sub>2</sub> SO <sub>4</sub>                                | -237                               | 101                                       | $9.1 \times 10^{-4}$                               |
| RuP <sub>2</sub> @N-P-C | 0.50 M H <sub>2</sub> SO <sub>4</sub>                                | -225 ± 5                           | 27.1 ± 0.6                                | $(1.0 \pm 0.3) \times 10^{-2}$                     |
| RuP <sub>2</sub> @N-P-C | 0.50 M H <sub>2</sub> SO <sub>4</sub><br>+ 0.03 M LiClO <sub>4</sub> | -235 ± 5                           | 27.2 ± 1.0                                | $(1.1 \pm 0.3) \times 10^{-2}$                     |
| RuP <sub>2</sub> @N-P-C | 0.50 M H <sub>2</sub> SO <sub>4</sub><br>+ 0.15 M LiClO <sub>4</sub> | -235 ± 5                           | 30.4 ± 0.9                                | $(1.4 \pm 0.4) \times 10^{-2}$                     |
| RuP <sub>2</sub> @N-P-C | 0.50 M H <sub>2</sub> SO <sub>4</sub><br>+ 0.27 M LiClO <sub>4</sub> | -235 ± 5                           | 30.5 ± 0.9                                | $(1.6 \pm 0.4) \times 10^{-2}$                     |
